# Supplementary material for: Digital gestresst durch Vorgesetzte?
Source: Atypon-hosted journal article supplement (doi:10.1026/0932-4089/a000416), 2023-10-12
Supplement: 0932-4089_a000416_esm1.pdf [file 0932-4089_a000416_esm1.pdf]

## Elektronische Supplemente (ESM)

### ESM 1

#### **Anlage A: Änderungen nach Durchführung des Pretests**

- Bei Item eins der Skala zu intellektueller Stimulierung wurde die ursprüngliche Formulierung „zentrale Annahmen“ ersetzt durch „Regeln und Voraussetzungen für Arbeitsprozesse“.
- Bei Item eins der Skala zu individueller Berücksichtigung wurde aufgrund der Doppeldeutigkeit der Aussage aus dem Originalitem „Meine direkte Führungskraft verbringt Zeit mit Führung und damit, den Mitarbeitern etwas beizubringen“ die Formulierung „mit Führung und“ weggelassen.
- Bei Item zwei und drei der TU-Skala wurde jeweils ein kurzes Beispiel zur Erläuterung der Begriffe „Software“ und „Hardware“ eingefügt.
- Bei den drei Items der Skala zur Erhebung von technischem Support wurde der Begriff „das Helpdesk unserer Organisation“ ergänzt durch „das Helpdesk/der IT-Ansprechpartner unserer Organisation“, um sicherzustellen, dass das Item auch ohne Vorhandensein eines Helpdesks erhoben werden kann.
- Aus demselben Grund wurde in Item drei der Skala zur Erhebung von Kompetenzförderung am Arbeitsplatz der Terminus „IT-Abteilung“ durch „IT-Ansprechpartner“ ersetzt.
