# Supplementary material for: Digital gestresst durch Vorgesetzte?
Source: Atypon-hosted journal article supplement (doi:10.1026/0932-4089/a000416), 2023-10-12
Supplement: 0932-4089_a000416_esm2.pdf [file 0932-4089_a000416_esm2.pdf]

## ESM 2

### **Anlage B: Faktorladungen und interne Konsistenz des MLQ 5x short und des genutzten TS-Erhebungsinstruments**

### **Anlage B1: Faktorladungen und interne Konsistenz der MLQ-Subdimensionen**

| Kategorie                                  | Items                                                                                                                                                                                                                                                                                                                                                     | Faktorladung<br>***          | Cronbach's<br>Alpha |
|--------------------------------------------|-----------------------------------------------------------------------------------------------------------------------------------------------------------------------------------------------------------------------------------------------------------------------------------------------------------------------------------------------------------|------------------------------|---------------------|
| Idealisierter Einfluss a                   | Meine direkte Führungskraft<br>...macht mich stolz darauf, mit ihr zu tun zu haben.<br>...stellt die eigenen Interessen zurück, wenn es um das Wohl der Gruppe geht.<br>...handelt in einer Weise, die bei mir Respekt erzeugt.<br>...strahlt Stärke und Vertrauen aus.                                                                                   | ,822<br>,740<br>,873<br>,861 | ,893                |
| Idealisierter Einfluss b                   | ...spricht mit anderen über ihre wichtigsten Überzeugungen und Werte.<br>...macht klar, wie wichtig es ist, sich 100%ig für eine Sache einzusetzen.<br>...berücksichtigt die moralischen und ethischen Konsequenzen von Entscheidungen.<br>...betont die Wichtigkeit von Teamgeist und einem gemeinsamen Aufgabenverständnis.                             | ,713<br>,705<br>,748<br>,763 | ,823                |
| Inspirierende Motivation                   | ...äußert sich optimistisch über die Zukunft.<br>...spricht mit Begeisterung über das, was erreicht werden soll.<br>...formuliert eine überzeugende Zukunftsvision.<br>...hat großes Vertrauen, dass die gesteckten Ziele erreicht werden.                                                                                                                | ,709<br>,849<br>,865<br>,754 | ,872                |
| Intellektuelle Stimulierung                | ...überprüft stets aufs Neue, ob gewohnte Abläufe und Voraussetzungen für Arbeitsprozesse noch angemessen sind.<br>...sucht bei der Lösung von Problemen nach unterschiedlichen Perspektiven.<br>...bringt mich dazu, Probleme aus verschiedenen Blickwinkeln zu betrachten.<br>...schlägt neue Wege vor, wie Aufgaben/Aufträge bearbeitet werden können. | ,722<br>,836<br>,835<br>,790 | ,875                |
| Individuelle Berücksichtigung              | ...verbringt Zeit damit, den Mitarbeitern etwas beizubringen.<br>...berücksichtigt meine Individualität und behandelt mich nicht nur als einen Mitarbeiter unter vielen.<br>...erkennt meine individuellen Bedürfnisse, Fähigkeiten und Ziele.<br>...hilft mir, meine Stärken auszubauen.                                                                 | ,697<br>,863<br>,902<br>,879 | ,899                |
| Kontingente Belohnung                      | ...bietet im Gegenzug für meine Anstrengungen ihre Hilfe an.<br>...macht deutlich, wer für bestimmte Leistungen verantwortlich ist.<br>...spricht klar aus, was man erwarten kann, wenn die gesteckten Ziele erreicht worden sind.<br>...zeigt Zufriedenheit, wenn andere die Erwartungen erfüllen.                                                       | ,782<br>,598<br>,742<br>,742 | ,806                |
| MbE_aktiv                                  | ...konzentriert sich überwiegend auf Unregelmäßigkeiten, Fehler, Ausnahmen und Abweichungen von Vorschriften.<br>...kümmert sich in erster Linie um Fehler und Beschwerden.<br>...verfolgt alle Fehler konsequent.<br>...macht mich auf Fehler aufmerksam, damit die Anforderungen erfüllt werden.                                                        | ,811<br>,809<br>,547<br>,421 | ,760                |
| Laissez-faire Führung*<br>* invers kodiert | ...ist immer da, wenn sie gebraucht wird.<br>...trifft schnell und ohne Zögern Entscheidungen.<br>...klärt wichtige Fragen sofort.                                                                                                                                                                                                                        | ,818<br>,724<br>,836         | ,839                |

\*\*\* Alle Faktorladungen sind signifikant auf dem Niveau  $p=0,001$

(Quelle: Eigene Darstellung)

## Anlage B2: Faktorladungen und interne Konsistenz der TS-Subdimensionen

| Kategorie          | Items                                                                                                                                                          | Faktorladung<br>*** | Cronbach's Alpha |
|--------------------|----------------------------------------------------------------------------------------------------------------------------------------------------------------|---------------------|------------------|
| Techno-Invasion    | Aufgrund von digitalen Technologien werde ich während meiner Ferien und Freizeit an Aufgaben erinnert.                                                         | ,64                 | ,67              |
|                    | Ich muss meine Ferien und Wochenenden opfern, um bei neuen digitalen Technologien auf dem Laufenden zu bleiben.                                                | ,67                 |                  |
|                    | Ich habe das Gefühl, dass mein Privatleben von digitalen Technologien übernommen wird.                                                                         | ,62                 |                  |
| Techno-Overload    | Digitale Technologien zwingen mich, mehr Aufgaben zu erledigen, als ich in der Lage bin.                                                                       | ,86                 | ,783             |
|                    | Ich habe aufgrund von digitalen Technologien weniger Zeit für einzelne Aufgaben und Termine.                                                                   | ,79                 |                  |
|                    | Ich bin gezwungen mein Arbeitsverhalten zu verändern, damit ich mich an neue digitale Technologien anpassen kann.                                              | ,61                 |                  |
| Techno-Complexity  | Ich weiß zu wenig über digitale Technologien, um meine Aufgaben ordentlich zu machen.                                                                          | ,74                 | ,854             |
|                    | Ich brauche lange, bis ich eine neue digitale Technologie verstanden habe und sie richtig benutzen kann.                                                       | ,79                 |                  |
|                    | Ich finde es schwierig, mir genug Zeit zu nehmen, um meine Fähigkeiten im Umgang mit Technologien zu verbessern und mehr über digitale Technologien zu lernen. | ,74                 |                  |
|                    | Ich finde, dass jüngere Kollegen in meiner Organisation mehr über digitale Technologien wissen als ich.                                                        | ,61                 |                  |
|                    | Neue digitale Technologien finde ich oft zu komplex zu verstehen und zu komplex, um sie zu benutzen.                                                           | ,80                 |                  |
| Techno-Uncertainty | In meinem Umfeld werden immer neue digitale Technologien eingesetzt.                                                                                           | ,61                 | ,836             |
|                    | In meinem Umfeld wird die Computer-Software ständig verändert.                                                                                                 | ,79                 |                  |
|                    | In meinem Umfeld wird die Computer-Hardware (z.B. Drucker/Bildschirme etc.) ständig verändert.                                                                 | ,77                 |                  |
|                    | In meinem Umfeld wird das Computer-Netzwerk ständig verändert.                                                                                                 | ,82                 |                  |
| Techno-Unsecurity  | Ich habe konstant das Gefühl, dass meine Zukunft durch neue digitale Technologien gefährdet ist.                                                               | ,57                 | ,669             |
|                    | Ich muss konstant meine Kenntnisse über digitale Technologien verbessern, da ich sonst nicht mehr mitkomme.                                                    | ,60                 |                  |
|                    | Ich fühle mich von Kollegen mit besseren Kenntnissen über digitale Technologien unter Druck gesetzt.                                                           | ,73                 |                  |
|                    | Ich habe das Gefühl, dass unter meinen Kollegen weniger Wissen geteilt wird, aus Angst davor, zurückgelassen oder ersetzt zu werden.                           | ,45                 |                  |

\*\*\* Alle Faktorladungen sind signifikant auf dem Niveau  $p=0,001$

(Quelle: Eigene Darstellung)
