# Supplementary material for: Digital gestresst durch Vorgesetzte?
Source: Atypon-hosted journal article supplement (doi:10.1026/0932-4089/a000416), 2023-10-12
Supplement: 0932-4089_a000416_esm3.pdf [file 0932-4089_a000416_esm3.pdf]

### ESM 3

#### **Anlage C: Interkorrelationen der Subdimensionen für das TS-Erhebungsinstrument und den MLQ 5x short**

##### **TS-Erhebungsinstrument**

|              |      |               | <b>Estimate</b> |
|--------------|------|---------------|-----------------|
| T.Invasion   | <--> | T.Overload    | ,633            |
| T.Overload   | <--> | T.Complexity  | ,466            |
| T.Complexity | <--> | T.Uncertainty | ,118            |
| T.Insecurity | <--> | T.Uncertainty | ,390            |
| T.Invasion   | <--> | T.Complexity  | ,216            |
| T.Invasion   | <--> | T.Uncertainty | ,187            |
| T.Insecurity | <--> | T.Invasion    | ,517            |
| T.Overload   | <--> | T.Uncertainty | ,291            |
| T.Insecurity | <--> | T.Overload    | ,613            |
| T.Insecurity | <--> | T.Complexity  | ,737            |

(Quelle: Eigene Darstellung)

##### **MLQ 5x short**

|     |      | <b>Estimate</b> |       |
|-----|------|-----------------|-------|
| IIa | <--> | IIb             | ,836  |
| IM  | <--> | IIb             | ,786  |
| IM  | <--> | IS              | ,669  |
| IS  | <--> | IC              | ,775  |
| IC  | <--> | CR              | ,899  |
| CR  | <--> | MBEa            | -,180 |
| LF  | <--> | MBEa            | ,145  |
| IIa | <--> | IM              | ,711  |
| IIa | <--> | IS              | ,833  |
| IIa | <--> | IC              | ,834  |
| IIa | <--> | CR              | ,870  |
| IIa | <--> | MBEa            | -,251 |
| IIb | <--> | IS              | ,753  |
| IIb | <--> | IC              | ,756  |
| IIb | <--> | CR              | ,842  |
| IIb | <--> | MBEa            | -,170 |
| IM  | <--> | IC              | ,603  |
| IM  | <--> | CR              | ,705  |
| IM  | <--> | MBEa            | -,202 |
| IS  | <--> | CR              | ,844  |
| IS  | <--> | MBEa            | -,158 |
| IC  | <--> | MBEa            | -,306 |
| LF  | <--> | IIa             | -,820 |
| LF  | <--> | CR              | -,822 |
| LF  | <--> | IC              | -,714 |
| LF  | <--> | IS              | -,699 |
| LF  | <--> | IM              | -,550 |
| LF  | <--> | IIb             | -,667 |

(Quelle: Eigene Darstellung)
