# Supplementary material for: Digital gestresst durch Vorgesetzte?
Source: Atypon-hosted journal article supplement (doi:10.1026/0932-4089/a000416), 2023-10-12
Supplement: 0932-4089_a000416_esm4.pdf [file 0932-4089_a000416_esm4.pdf]

## ESM 4

**Anlage D: Prüfung der Voraussetzungen zur Strukturgleichungsmodellierung**

**Anlage D1: Die Korrelationsmatrix weist einen vollen Rang auf**

### **Korrelationsmatrix<sup>a</sup>**



a. Determinante = 9,528E-17

(Quelle: Eigene Darstellung)

Determinante der Korrelationsmatrix aller manifesten Variablen ist  $\neq 0$

## **Anlage D2: Stichprobengröße und Zahl der Freiheitsgrade**

Eine angemessene Stichprobengröße wurde bereits a priori berechnet. Die reale Stichprobe liegt mit  $N=849$  deutlich oberhalb der geforderten  $N=215$  und ist somit geeignet für die Strukturgleichungsmodellierung.

Zudem muss die Zahl der Freiheitsgrade (engl. „degrees of freedom“ = (df)) – d.h. die Differenz zwischen der Anzahl empirischer Informationen und der Modellparameter im Gesamtmodell in jedem Fall positiv sein. Man spricht dann von einem „überidentifizierten Modell“. Nur in einem solchen Fall ist eine sinnvolle Analyse eines SEMs möglich (vgl. Werner et al., 2016). Im vorliegenden Modell ist dies gegeben und es gilt  $df > 300$ .

## **Literatur**

Werner, C. S., Schermelleh-Engel, K., Gerhard, C. & Gåde, J. C. (2016). Strukturgleichungsmodelle. In Döring, N. & Bortz, J. (Hrsg.), *Forschungsmethoden und Evaluation in den Sozial- und Humanwissenschaften* (S. 945 – 973). Berlin, Heidelberg: Springer.

### Anlage D3: Durchschnittlich erklärte Varianz (AVE) und konvergente Validität der Konstrukte

| Konvergente Validität             | Transf. Führung | MbEa  | Laissez-faire Führung | Dig_Komp. | Lit_Fac. | T_Supp. | Technostress |
|-----------------------------------|-----------------|-------|-----------------------|-----------|----------|---------|--------------|
| Durchschnittlich erklärte Varianz | 0,67            | 0,45  | 0,644                 | 0,712     | 0,49     | 0,686   | 0,37         |
| Kongenerische Reliabilität        | 0,91            | 0,756 | 0,843                 | 0,881     | 0,79     | 0,866   | 0,724        |

(Quelle: Eigene Darstellung)

Die kongenerische Reliabilität stellt ein Reliabilitätskriterium dar, das im Vergleich zum Cronbachs Alpha Koeffizienten verlässlicher ist, falls sich – wie hier – die Faktorladungen der manifesten Variablen unterscheiden (vgl. Loehlin & Beaujean, 2017). Die Werte der kongenerischen Reliabilität sollten oberhalb von 0,6 liegen (vgl. Weiber & Mühlhaus, 2014). Es ist ersichtlich, dass alle Konstrukte reliabel sind. Problematisch mit Blick auf konvergente Validität sind die Werte der durchschnittlich erklärten Varianz bei den Konstrukten MbEa und insbesondere Technostress, da diese unterhalb von 0,5 sind. Allerdings sind bei vorausgegangenen Studien standardisierte Faktorladungen gemessen worden, die zu ähnlich geringen AVE-Werten für das Konstrukt Technostress führen (vgl. Tarafdar et al., (2007), S. 316; Tarafdar et al., (2010), S. 326). Somit werden die fraglichen Konstrukte für alle durchzuführenden Berechnungen beibehalten.

### Literatur

- Loehlin, J. C. & Beaujean, A. A. (2017). *Latent variable models. An introduction to factor, path, and structural equation analysis*. New York: Routledge.
- Tarafdar, M., Tu, Q. & Ragu-Nathan, T. S. (2010). Impact of technostress on end-user satisfaction and performance. *Journal of Management Information Systems*, 27, 303 – 334. <https://doi.org/10.2753/MIS0742-1222270311>
- Weiber, R. & Mühlhaus, D. (2014). *Strukturgleichungsmodellierung. Eine anwendungsorientierte Einführung in die Kausalanalyse mit Hilfe von AMOS, SmartPLS und SPSS*. Berlin, Heidelberg: Springer.

#### Anlage D4: Konvergente und diskriminante Validität

Für eine akzeptable Bewertung konvergenter Validität sollte die AVE für jedes Konstrukt über 50% liegen. Diskriminante Validität wird dann überprüft, indem alle Konstrukte paarweise auf Korrelation untersucht werden und der Korrelationskoeffizient  $r$  anschließend mit der AVE beider Konstrukte verglichen wird. Sofern für alle AVEs gilt:  $r < \sqrt{AVE}$ , ist diskriminante Validität der Konstrukte gegeben (vgl. Ayyagari et al., 2011).

| Diskriminante Validität        | Korrelation $r$ | Korrelationen quadriert $r^2$ | AVE1  | AVE2  | Diskriminante Validität? (beide AVEs $>r^2$ ) |
|--------------------------------|-----------------|-------------------------------|-------|-------|-----------------------------------------------|
| Transform_F. <--> MbEa         | -,246           | 0,060516                      | 0,67  | 0,45  | erfüllt                                       |
| Transform_F. <--> LF           | -,820           | 0,6724                        | 0,67  | 0,644 | grenzwertig                                   |
| Transform_F. <--> Dig_Komp.    | ,180            | 0,0324                        | 0,67  | 0,712 | erfüllt                                       |
| Transform_F. <--> Lit_Fac.     | ,481            | 0,231361                      | 0,67  | 0,49  | erfüllt                                       |
| Transform_F. <--> T_Supp.      | ,179            | 0,032041                      | 0,67  | 0,686 | erfüllt                                       |
| Transform_F. <--> Technostress | -,212           | 0,044944                      | 0,67  | 0,37  | erfüllt                                       |
| MbEa <--> LF                   | ,145            | 0,021025                      | 0,45  | 0,644 | erfüllt                                       |
| MbEa <--> Dig_Komp.            | -,037           | 0,001369                      | 0,45  | 0,712 | erfüllt                                       |
| MbEa <--> Lit_Fac.             | -,036           | 0,001296                      | 0,45  | 0,49  | erfüllt                                       |
| MbEa <--> T_Supp.              | -,088           | 0,007744                      | 0,45  | 0,686 | erfüllt                                       |
| MbEa <--> Technostress         | ,220            | 0,0484                        | 0,45  | 0,37  | erfüllt                                       |
| LS <--> Dig_Komp.              | -,124           | 0,015376                      | 0,644 | 0,712 | erfüllt                                       |
| LS <--> Lit_Fac.               | -,385           | 0,148225                      | 0,644 | 0,49  | erfüllt                                       |
| LS <--> T_Supp.                | -,201           | 0,040401                      | 0,644 | 0,686 | erfüllt                                       |
| LS <--> Technostress           | ,148            | 0,021904                      | 0,644 | 0,37  | erfüllt                                       |
| Dig_Komp. <--> Lit_Fac.        | ,247            | 0,061009                      | 0,712 | 0,49  | erfüllt                                       |
| Dig_Komp. <--> T_Supp.         | ,116            | 0,013456                      | 0,712 | 0,686 | erfüllt                                       |
| Dig_Komp. <--> Technostress    | -,464           | 0,215296                      | 0,712 | 0,37  | erfüllt                                       |
| Lit_Fac. <--> T_Supp.          | ,568            | 0,322624                      | 0,49  | 0,686 | erfüllt                                       |
| Lit_Fac. <--> Technostress     | -,193           | 0,037249                      | 0,49  | 0,37  | erfüllt                                       |
| T_Supp. <--> Technostress      | -,141           | 0,019881                      | 0,686 | 0,37  | erfüllt                                       |

(Quelle: Eigene Darstellung)
