# Supplementary material for: Digital gestresst durch Vorgesetzte?
Source: Atypon-hosted journal article supplement (doi:10.1026/0932-4089/a000416), 2023-10-12
Supplement: 0932-4089_a000416_esm5.pdf [file 0932-4089_a000416_esm5.pdf]

## ESM 5

### Anlage E: Mediator-Test nach Sobel

#### Zu testende Mediator-Situationen:

- 1.) Transform\_F. -> Lit\_Fac. -> Dig\_Komp.
- 2.) Lit\_Fac. -> Dig\_Komp. -> Technostress
- 3.) T\_Supp. -> Lit\_Fac. -> Dig\_Komp.

#### Beispiel zu 1)

Sei  $a$  der unstandardisierte Effekt von Transform\_F. auf Lit\_Fac. und  $SE_a$  der zugehörige Standardfehler. Sei  $b$  der unstandardisierte Effekt von Lit\_Fac. auf Dig\_Komp. und  $SE_b$  der zugehörige Standardfehler.

⇒ Berechne  $z = \frac{a \cdot b}{SE_{ab}}$ , wobei  $SE_{ab}$  der Standardfehler des indirekten Effekts von Transform\_F. auf Dig\_Komp. ist. Diesen berechnet man nach Sobel wie folgt:

$$SE_{ab} = \sqrt{(SE_a)^2 \cdot b^2 + (SE_b)^2 \cdot a^2} \quad (\text{vgl. Urban \& Mayerl (2007), S. 8})$$

$$\text{Im Beispiel: } z = \frac{0,376 \cdot 0,235}{\sqrt{0,035^2 \cdot 0,235^2 + 0,037^2 \cdot 0,376^2}} \approx 5,47$$

Der so erhaltene z-Wert ist größer als 1,96 (mehr als 1,96 Standardabweichungen über dem Mittelwert) daher ist Lit\_Fac. tatsächlich ein Mediator zwischen Transform\_F. und Dig\_Komp.

Analog erhält man für 2.)  $z \approx 4,63 > 1,96$  und 3.)  $z \approx 4,86 > 1,96$ .

Somit wird in allen drei Fällen der Mediationseffekt bestätigt.

## Literatur

Urban, D. & Mayerl, J. (2007). *Mediator-Effekte in der Regressionsanalyse (direkte, indirekte und totale Effekte)*. Stuttgart: Institut für Sozialwissenschaften.
