# Supplementary material for: Digital gestresst durch Vorgesetzte?
Source: Atypon-hosted journal article supplement (doi:10.1026/0932-4089/a000416), 2023-10-12
Supplement: 0932-4089_a000416_esm6.pdf [file 0932-4089_a000416_esm6.pdf]

## ESM 6

### Anlage F: Analyse der Kontrollvariablen

Im Rahmen der Untersuchung wurde überprüft, ob die im Modell nachgewiesenen Zusammenhänge durch die erhobenen Kontrollvariablen Alter, Geschlecht, Berufserfahrung und höchster beruflicher Abschluss beeinflusst werden. Dazu wurden die entsprechenden Variablen in das aufgestellte Strukturmodell integriert und ihre Pfadkoeffizienten zu allen endogenen Variablen (also Technostress, Dig\_Komp. und Lit\_Fac.) ermittelt. Die Ergebnisse sind in der folgenden Tabelle dargestellt:

| Beziehung                        | Standardisierter Pfadkoeffizient |
|----------------------------------|----------------------------------|
| Lit_Fac. ← Alter                 | n.s.                             |
| Lit_Fac. ← Geschlecht            | n.s.                             |
| Lit_Fac. ← Berufl. Abschluss     | n.s.                             |
| Lit_Fac. ← Erfahrung             | n.s.                             |
| Dig_Komp. ← Alter                | -,229***                         |
| Dig_Komp. ← Geschlecht           | -,194***                         |
| Dig_Komp. ← Berufl. Abschluss    | n.s.                             |
| Dig_Komp. ← Erfahrung            | n.s.                             |
| Technostress ← Alter             | 0,07 n.s. (p=0,076)              |
| Technostress ← Geschlecht        | -,121**                          |
| Technostress ← Berufl. Abschluss | n.s.                             |
| Technostress ← Erfahrung         | ,102**                           |

**Tabelle 5:** Einfluss der Kontrollvariablen

(\*\*\* $p < 0.001$ ; \*\* $p < 0.01$ ; \* $p < 0.05$ ; n.s.= nicht signifikant)

(Quelle: Eigene Darstellung)

Es ist ersichtlich, dass der berufliche Abschluss der befragten Mitarbeiter\_innen keinen Einfluss auf die ermittelten Zusammenhänge hat. Dies bestätigt bereits vorhandene Ergebnisse von Marchiori et al. (2018), während Tarafdar et al. (2011) und Krishnan (2017) eine TS-Steigerung in Verbindung mit einem niedrigeren beruflichen Abschluss beobachteten.

Das Geschlecht hingegen hat signifikante Einflüsse auf das TS-Empfinden. Frauen empfinden demnach weniger TS als Männer ( $\beta = -,121^{**}$ ). Die Untersuchungen von Ragu-Nathan et al. (2008), Tarafdar et al. (2011) und Jena & Mahanti (2014) kamen zu analogen Ergebnissen. Jena & Mahanti (2014) sehen dies darin begründet, dass Männer dazu neigen, IKT häufiger zu nutzen als Frauen. Die im Rahmen der vorliegenden Studie festgestellte höhere durchschnittliche Nutzungszeit bei Männern deutet auf eine Bestätigung dieser Beobachtung hin. Auch hier besteht jedoch kein wissenschaftlicher Konsens. Gimpel et al. (2018) und Marchiori et al. (2018) beobachten ein niedrigeres TS-Level bei Männern. Die Tatsache, dass die Unterschiede in der vorliegenden Studie nur minimal sind, könnte dem niedrigen Durchschnittsalter der Stichprobe geschuldet sein. Morris, Venkatesh & Ackerman (2005) vermuten,

dass geschlechtsspezifische Unterschiede in der Technologie-Adaption bei jüngeren Angestellten weniger signifikant ausfallen (vgl. Morris et al., 2005).

Weiterhin nimmt das TS-Empfinden mit höherer Berufserfahrung signifikant zu ( $\beta=,102^*$ ). Dies könnte so interpretiert werden, dass sich Mitarbeiter\_innen mit längerer Berufserfahrung gegenüber kürzlich eingestellten Kolleg\_innen schlechter auf die Anforderungen der digitalen Technologien vorbereitet sehen. Dazu passend ist der Befund, dass die Dig\_Komp. der Befragten mit zunehmendem Alter signifikant abnimmt ( $\beta=-,229^{***}$ ).

Darüber hinaus erweist sich auch das Geschlecht der Befragten als signifikanter Einflussfaktor auf deren Dig\_Komp. ( $\beta=-,194^{***}$ ). Diese ist bei der vorliegenden Stichprobe bei Männern höher als bei Frauen.

## Literatur

- Jena, R. K. & Mahanti, P. K. (2014). An empirical study of technostress among Indian academicians. *International Journal of Education and Learning*, 3(2), 1 – 10. <https://doi.org/10.14257/ijel.2014.3.2.01>
- Krishnan, S. (2017). Personality and espoused cultural differences in technostress creators. *Computers in Human Behavior*, 66, 154 – 167. <https://doi.org/10.1016/j.chb.2016.09.039>
- Morris, M. G., Venkatesh, V. & Ackerman P. L. (2005). Gender and age differences in employee decisions about new technology: An extension to the theory of planned behavior. *IEEE Transactions on Engineering Management*, 52(1), 69 – 84. <https://doi.org/10.1109/TEM.2004.839967>
- Tarafdar, M., Tu, Q., Ragu-Nathan, T. S. & Ragu-Nathan, B. S. (2011). Crossing to the dark side: Examining creators, outcomes, and inhibitors of technostress. *Communications of the ACM*, 54(9), 113 – 120. <https://doi.org/10.1145/1995376.1995403>
