# Supplementary material for: Digital gestresst durch Vorgesetzte?
Source: Atypon-hosted journal article supplement (doi:10.1026/0932-4089/a000416), 2023-10-12
Supplement: 0932-4089_a000416_esm7.pdf [file 0932-4089_a000416_esm7.pdf]

## ESM 7

### Anlage G: Branchen der Studienteilnehmer\_innen

N=849

Selbstauskunft, Mehrfachnennung möglich

|                |                            |       |                             |       |
|----------------|----------------------------|-------|-----------------------------|-------|
| <b>Branche</b> | Administration/Verwaltung: | 19,7% | Handwerk:                   | 1,1%  |
|                | Bau/Architektur:           | 1,5%  | Industrie:                  | 13,8% |
|                | Beratung/Consulting:       | 8,8%  | IT:                         | 6,5%  |
|                | Bildung/Erziehung:         | 7,9%  | Landwirtschaft:             | 0,1%  |
|                | Chemie:                    | 2,5%  | Marketing/Werbung/PR:       | 5,9%  |
|                | Dienstleistung:            | 16,3% | Medizin/Pharma:             | 6,2%  |
|                | Forschung/Entwicklung:     | 4,4%  | Tourismus/Gastronomie:      | 3,5%  |
|                | Gesundheit/Soziales:       | 14,4% | Transport/Verkehr/Logistik: | 4,8%  |
|                | Handel:                    | 8,0%  | Sonstige:                   | 11,4% |

(Quelle: Eigene Darstellung)
