# Supplementary material for: Digital gestresst durch Vorgesetzte?
Source: Atypon-hosted journal article supplement (doi:10.1026/0932-4089/a000416), 2023-10-12
Supplement: 0932-4089_a000416_esm8.pdf [file 0932-4089_a000416_esm8.pdf]

## ESM 8

### **Anlage H: Ergebnisdarstellung zu den Hypothesen**

Hinsichtlich der angenommenen direkten Einflüsse des Führungsverhaltens der unmittelbar vorgesetzten Führungskraft auf das Technostress-Empfinden der ihr unterstellten Mitarbeiter\_innen (*H1–H3*) bestätigt sich lediglich der direkte statistische Einfluss von „Management by Exception active“. Ein aktiv kontrollierendes Führungsverhalten, das vorrangig auf Fehler der Mitarbeiter\_innen sowie deren Korrektur abzielt, geht mit einem gesteigerten Technostress-Empfinden der unterstellten Mitarbeiter\_innen einher.

Transformationale Führung und Laissez-faire Führung hingegen zeigen keine direkten Effekte auf das TS-Empfinden.

Die angenommenen TS-verstärkenden Effekte einer gesteigerten durchschnittlichen täglichen Nutzungszeit digitaler Technologien für arbeitsbezogene Aufgaben werden bestätigt (*H8*;  $\beta=0,193^{***}$ ).

Auch zeigen sich deutliche Hinweise für die Wirksamkeit der Techno-Inhibitoren „Kompetenzförderung am Arbeitsplatz (Lit\_Fac.)“ und „technischer Support (T\_Supp.)“ gegen Technostress. Technischer Support hat direkte (wenn auch vergleichsweise geringe) TS-reduzierende Effekte (*H7*;  $\beta=-0,087^*$ ). Gleichzeitig zeigen sich auch deutlich positive Effekte auf die „Kompetenzförderung am Arbeitsplatz“ (*H9*;  $\beta=0,414^{***}$ ). „Kompetenzförderung am Arbeitsplatz“ hingegen wirkt nicht direkt auf das TS-Empfinden, führt jedoch zu einer signifikanten Steigerung des kompetenten Umgangs mit neuen Technologien (*H5*;  $\beta=0,265^{***}$ ). Der kompetente Umgang mit neuen Technologien (Dig\_Komp.) wiederum hat eine deutlich TS-reduzierende Wirkung – sowohl auf Technostress im Ganzen (*H6.1*;  $\beta=-0,261^{***}$ ) als auch insbesondere auf Techno-Complexity (*H6.2*;  $\beta=-0,501^{***}$ ). Somit wirkt Lit\_Fac. indirekt TS-reduzierend. Gleiches gilt auch für einen qualitativ hochwertigen technischen Support. Dieser hat nicht nur einen unmittelbaren TS-reduzierenden Effekt, sondern wirkt zudem indirekt über Lit\_Fac. und Dig\_Komp. der Entstehung von Technostress entgegen.

Weiterhin wird deutlich, dass transformationale Führung der unmittelbaren Vorgesetzten ebenfalls indirekt TS-reduzierend bei den ihnen unterstellten Mitarbeiter\_innen wirkt. Transformationale Führung korreliert positiv mit Lit\_Fac. (*H4*;  $\beta=0,424^{***}$ ), Lit\_Fac. wiederum wirkt wie beschrieben über Dig\_Komp. TS-reduzierend (*H5/H6.1/2*).

Bei den beschriebenen indirekten Effekten handelt es sich um „totale Mediatoreffekte“, das heißt die betreffenden Variablen haben ausschließlich indirekte Effekte auf die endogene Variable Technostress. Einzige Ausnahme bildet der T\_Supp., der sowohl direkt als auch indirekt auf TS wirkt. Alle indirekten Effekte sind mittels des Mediator-Tests nach Sobel ( $Z \approx 4,63 - 5,47$ ) überprüft worden und haben sich als signifikant erwiesen.

Demnach stellt Lit\_Fac. einen Mediator zwischen transformationaler Führung und Dig\_Komp. dar und gleichzeitig zwischen T\_Supp. und Dig\_Komp. Dig\_Komp. ist ein Mediator zwischen Lit\_Fac. und Technostress.
